# Supplementary material for: Magnetically induced ring currents in metallocenothiaporphyrins
Source: Royal Society of Chemistry journal article supplement (doi:10.1039/d1cp04779e), 2021-12-20
Supplement: d1cp04779e1.pdf [file d1cp04779e1.pdf]

## Supporting Information

### Magnetically induced ring currents in metallocenothiaporphyrins

Rashid R. Valiev,<sup>a,b</sup> Theo Kurtén,<sup>b</sup> Lenara I. Valiulina,<sup>a</sup> Sergey Yu. Ketkov,<sup>c</sup> Viktor N. Cherepanov,<sup>a</sup> Maria Dimitrova<sup>b</sup> and Dage Sundholm<sup>\*b</sup>

<sup>a</sup> Department of Optics and Spectroscopy, Tomsk State University, Tomsk, 634050, Russia

<sup>b</sup> Department of Chemistry, Faculty of Science, University of Helsinki, FIN-00014, Helsinki, Finland

<sup>c</sup> Laboratory of Structures of Organometallic and Coordination Compounds, G.A.Razuvaev Institute of Organometallic Chemistry, RAS 49 Tropinin St. Nizhny Novgorod 603950, Russia

\* Corresponding author: sundholm@chem.helsinki.fi

#### 1. Bond lengths

**Table S1.** The average bond lengths (in Å) between the metal and the C atoms of the cyclopentadienyl rings.

| Metal | (C <sub>5</sub> H <sub>5</sub> ) <sub>2</sub> MP |         |         |        | H <sub>2</sub> -(C <sub>5</sub> H <sub>5</sub> ) <sub>2</sub> MP |         |         |        |
|-------|--------------------------------------------------|---------|---------|--------|------------------------------------------------------------------|---------|---------|--------|
|       | Singlet                                          | Triplet | Quartet | Sextet | Singlet                                                          | Triplet | Quartet | Sextet |
| V     | 2.25                                             | 2.315   | 2.314   |        | 2.244                                                            | 2.313   | 2.316   |        |
| Cr    | 2.225                                            | 2.222   |         |        | 2.212                                                            | 2.206   |         |        |
| Mn    | 2.155                                            | 2.175   |         | 2.416  | 2.145                                                            | 2.222   |         | 2.427  |
| Fe    | 2.086                                            | 2.098   |         |        | 2.090                                                            | 2.110   |         |        |
| Co    | 2.079                                            | 2.110   |         |        | 2.102                                                            | 2.288   |         |        |
| Ni    | 2.195                                            | 2.229   |         |        | 2.376                                                            | 2.258   |         |        |
| Mo    | 2.317                                            | 2.333   |         |        | 2.297                                                            | 2.331   |         |        |
| Tc    | 2.239                                            | 2.276   |         | 2.335  | 2.246                                                            | 2.292   |         | 2.488  |
| Ru    | 2.209                                            | 2.212   |         |        | 2.217                                                            | 2.221   |         |        |
| Rh    | 2.219                                            | 2.231   |         |        | 2.247                                                            | 2.253   |         |        |

#### 2. Relative energies

**Table S2.** The relative energy (in kcal/mol) between the singlet and triplet states of the studied molecules.

| Metal           | (C <sub>5</sub> H <sub>5</sub> ) <sub>2</sub> MP |         | H <sub>2</sub> -(C <sub>5</sub> H <sub>5</sub> ) <sub>2</sub> MP |         |
|-----------------|--------------------------------------------------|---------|------------------------------------------------------------------|---------|
|                 | Singlet                                          | Triplet | Singlet                                                          | Triplet |
| V <sup>+</sup>  | 21.71                                            | 0       | 30.48                                                            | 0       |
| Cr              | 29.49                                            | 0       | 23.59                                                            | 0       |
| Mn <sup>+</sup> | 24.13                                            | 0       | 18.02                                                            | 0       |
| Fe              | 0                                                | 12.02   | 0                                                                | 17.84   |
| Co <sup>+</sup> | 0                                                | 7.58    | 0                                                                | 9.13    |
| Ni              | 4.42                                             | 0       | 8.14                                                             | 0       |
| Mo              | 2.06                                             | 0       | 10.23                                                            | 0       |
| Tc <sup>+</sup> | 2.08                                             | 0       | 0                                                                | 2.19    |
| Ru              | 0                                                | 13.20   | 0                                                                | 20.23   |
| Rh <sup>+</sup> | 0                                                | 10.04   | 0                                                                | 22.78   |

### 3. Electron configuration of metallocenes

Table S3. Ground-state electron configuration of neutral and cationic metallocenes ( $\text{Cp}_2\text{M}$ ).

| $\text{Cp}_2\text{M}$ | Neutral                               | Cation                                |
|-----------------------|---------------------------------------|---------------------------------------|
| V                     | $(e_2')^2(a_1')^1(e_1'')^0 (^4A_2')$  | $(e_2')^2(a_1')^0(e_1'')^0 (^3A_2')$  |
| Cr                    | $(e_2')^3(a_1')^1(e_1'')^0 (^3E_2')$  | $(e_2')^2(a_1')^1(e_1'')^0 (^4A_2')$  |
| Mn                    | $(e_2')^2(a_1')^1(e_1'')^2 (^6A_1')$  | $(e_2')^2(a_1')^1(e_1'')^1 (^5E_1'')$ |
| Fe                    | $(e_2')^4(a_1')^2(e_1'')^0 (^1A_1')$  | $(e_2')^3(a_1')^2(e_1'')^0 (^2E_2')$  |
| Co                    | $(e_2')^4(a_1')^2(e_1'')^1 (^2E_1'')$ | $(e_2')^4(a_1')^2(e_1'')^0 (^1A_1')$  |
| Ni                    | $(e_2')^4(a_1')^2(e_1'')^2 (^3A_2')$  | $(e_2')^4(a_1')^2(e_1'')^1 (^2E_1'')$ |

### 4. Ring-current strengths

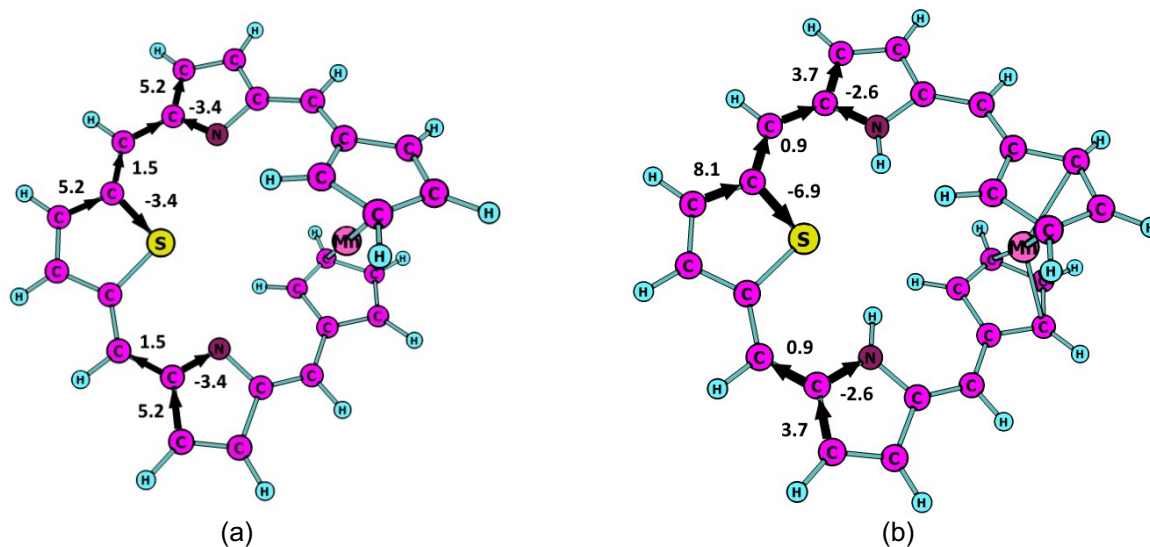

**Figure S1.** The strength of the ring current (in nA/T) passing along selected bonds of (a) the sextet state of  $(\text{C}_5\text{H}_5)_2\text{MnP}$  and (b) of the sextet state of  $\text{H}_2-(\text{C}_5\text{H}_5)_2\text{MnP}$ .

## 5. Streamline representations of the magnetically induced current density

### 5.1. $\text{H}_2\text{-(C}_5\text{H}_5)_2\text{FeP}$

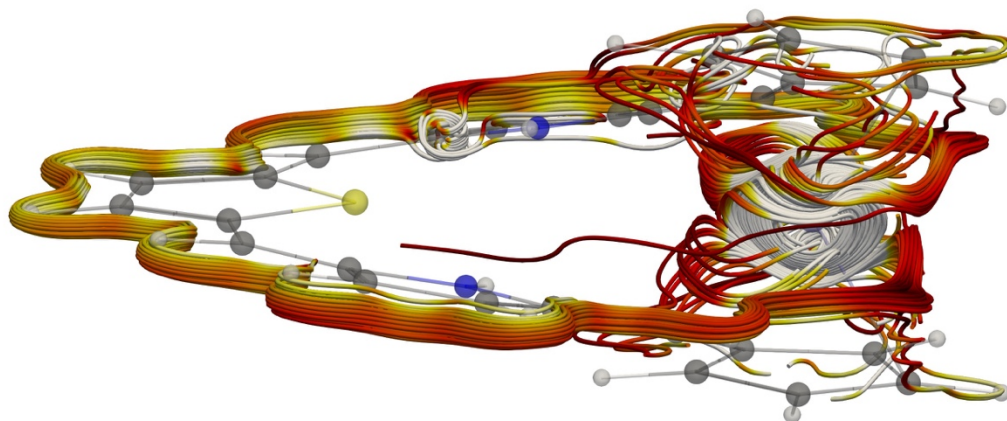

**Figure S2.** A streamline representation of the global diatropic magnetically induced current-density pathway in  $\text{H}_2\text{-(C}_5\text{H}_5)_2\text{FeP}$  outside the skeleton of the molecule.

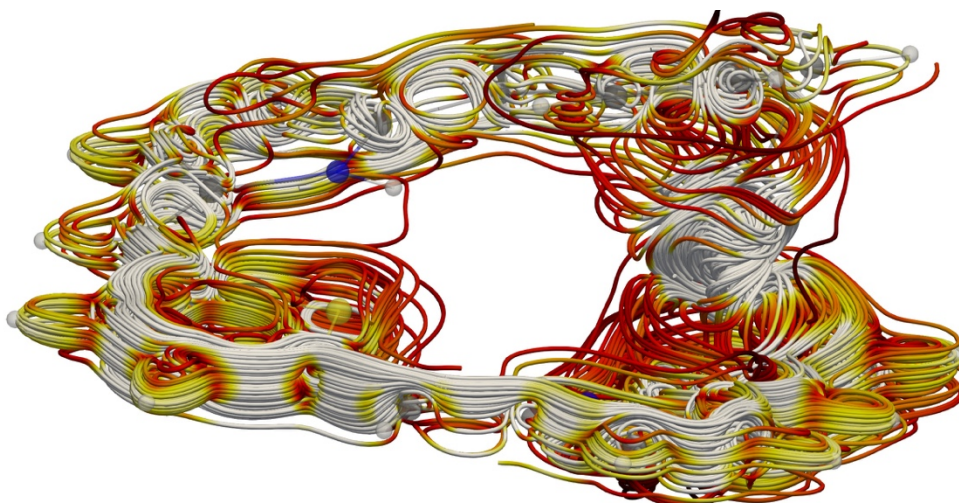

**Figure S3.** A streamline representation of the global diatropic magnetically induced current-density pathway in  $\text{H}_2\text{-(C}_5\text{H}_5)_2\text{FeP}$  at the skeleton of the molecule.

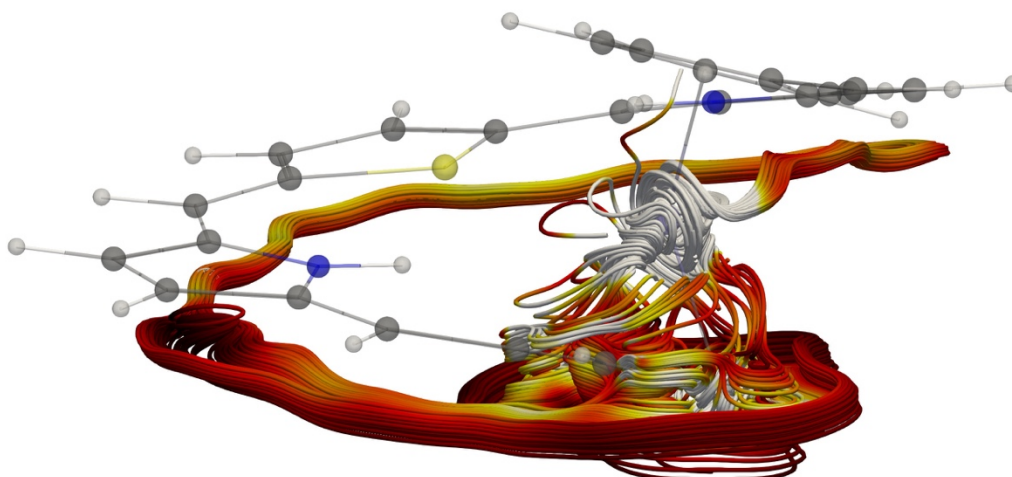

**Figure S4.** A streamline representation of the global diatropic magnetically induced current-density pathway in  $\text{H}_2\text{-(C}_5\text{H}_5)_2\text{FeP}$  on one side of the molecule.

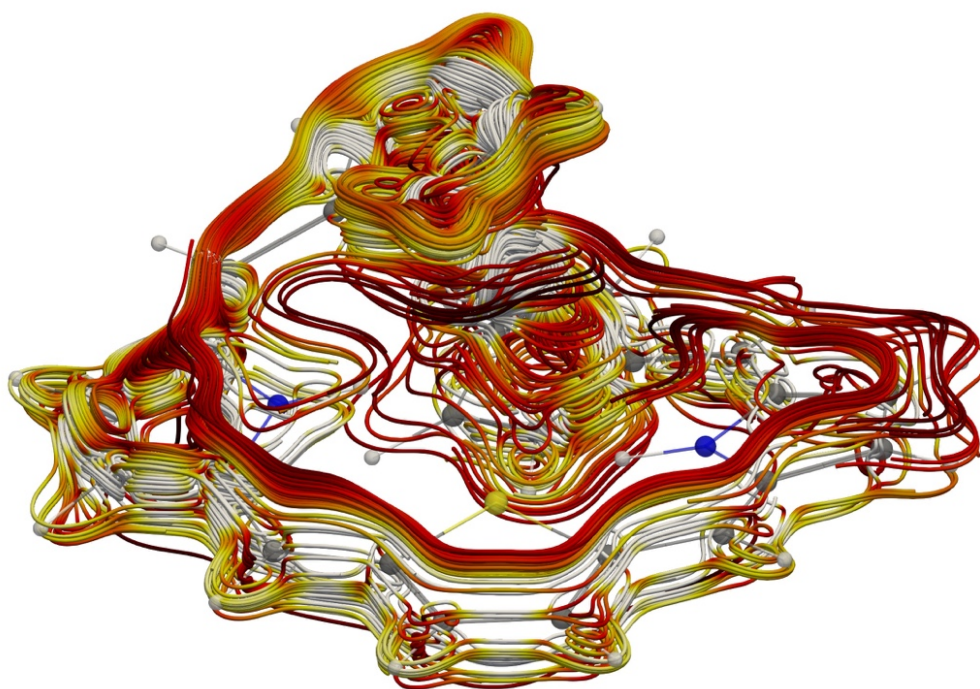

**Figure S5.** A streamline representation of the global diatropic magnetically induced current-density pathway in  $\text{H}_2\text{-(C}_5\text{H}_5)_2\text{FeP}$  passing over the ferrocene moiety.

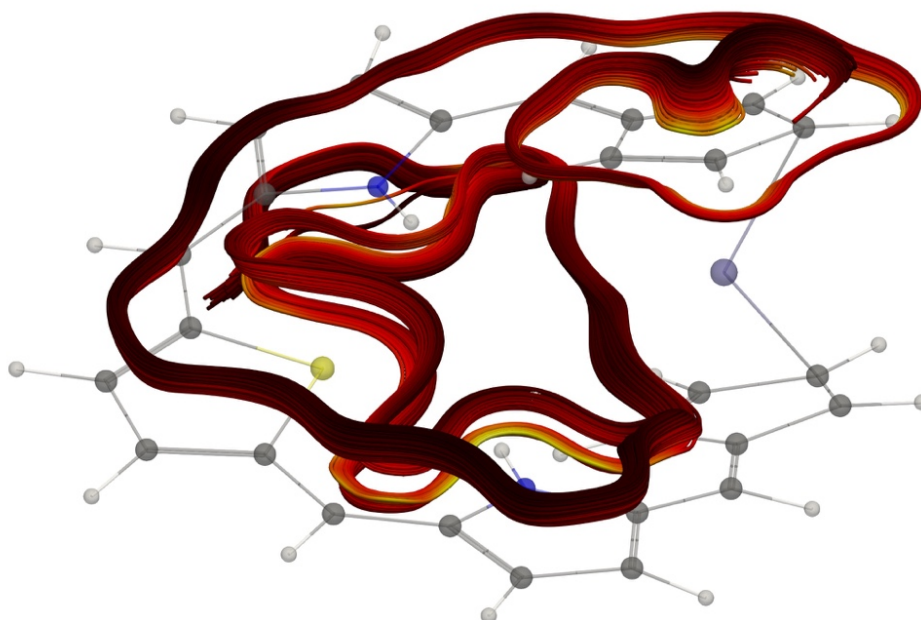

**Figure S6.** A streamline representation of the global paratropic magnetically induced current-density pathway in  $\text{H}_2\text{-(C}_5\text{H}_5)_2\text{MnP}$  on one side of the molecule.



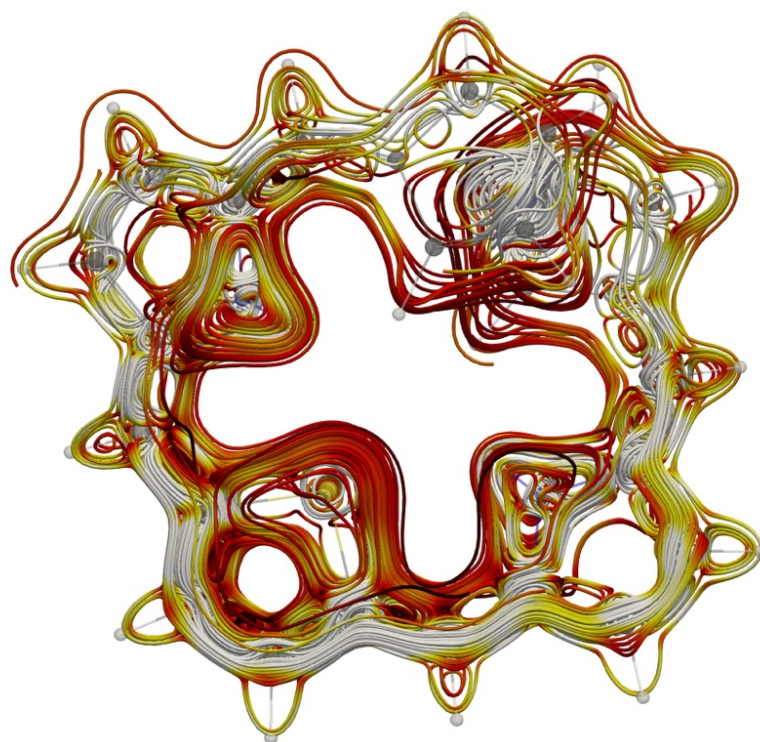

**Figure S7.** A streamline representation of the global magnetically induced current-density pathways in  $\text{H}_2\text{-(C}_5\text{H}_5)_2\text{FeP}$ , top view.

5.2.  $(\text{C}_5\text{H}_5)_2\text{FeP}$

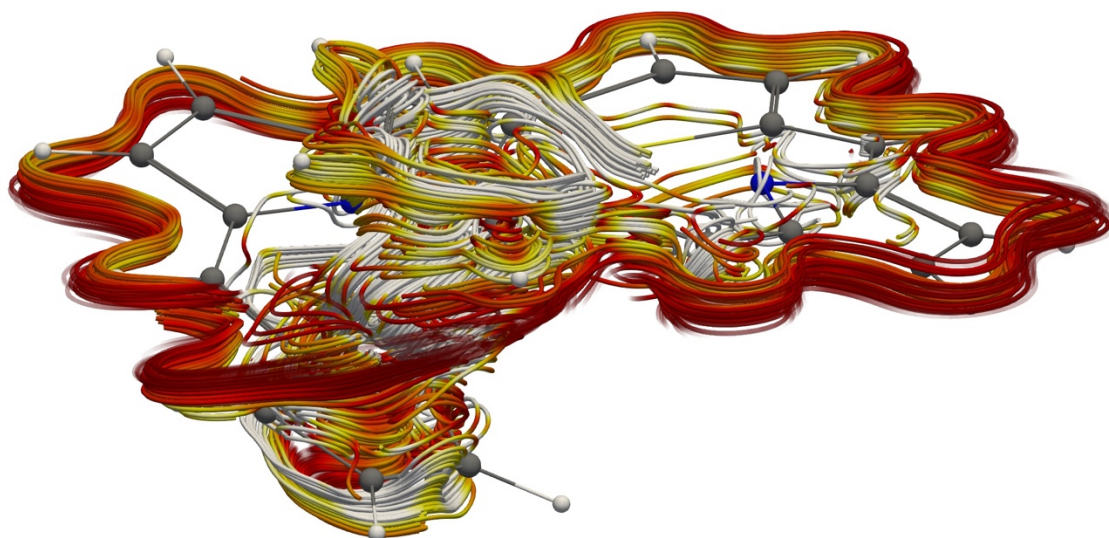

**Figure S8.** A streamline representation of the global diatropic magnetically induced current-density pathway in  $(\text{C}_5\text{H}_5)_2\text{FeP}$  outside the skeleton of the molecule.

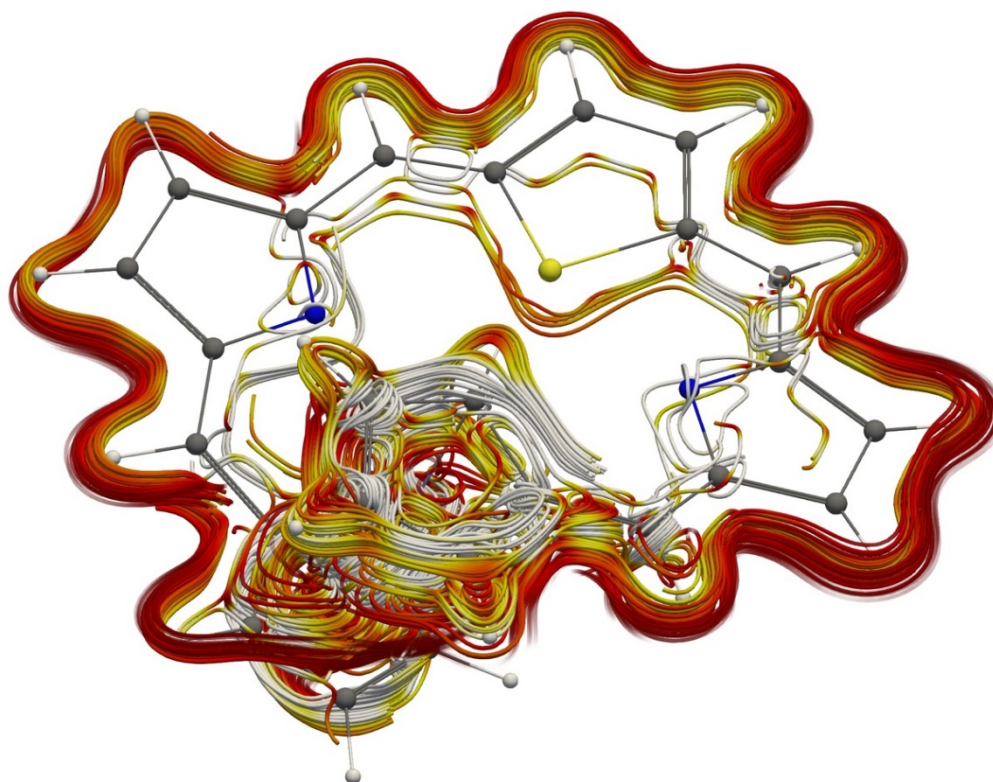

**Figure S9.** A streamline representation of the global diatropic magnetically induced current-density pathway in  $(C_5H_5)_2FeP$  outside the skeleton of the molecule.

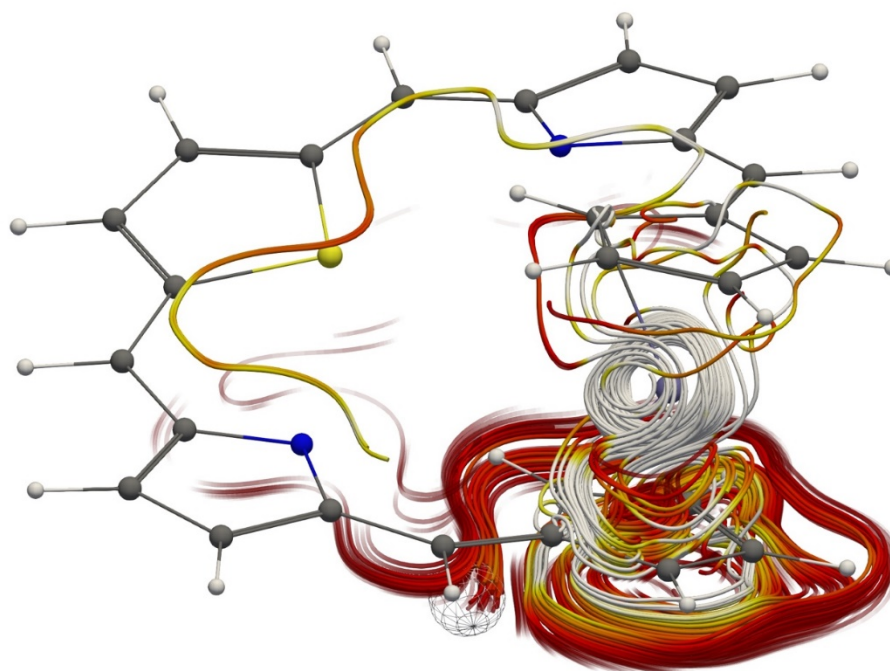

**Figure S10.** A streamline representation of the global paratropic magnetically induced current-density pathway in  $(C_5H_5)_2FeP$  extending over the ferrocene unit, side view.

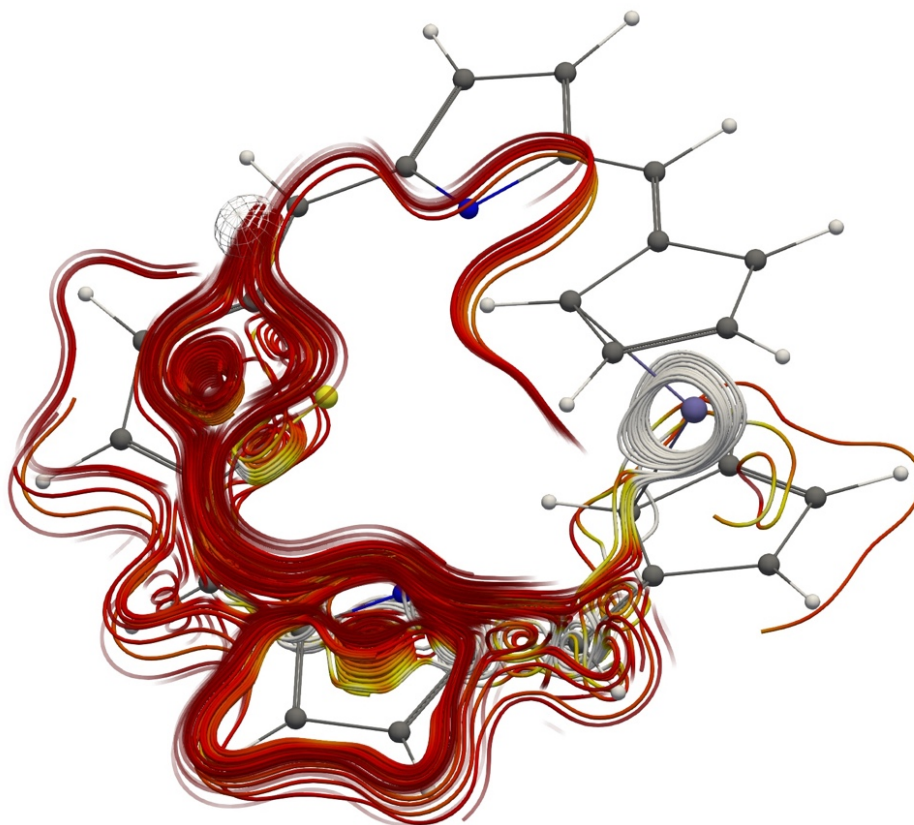

**Figure S11.** A streamline representation of the global paratropic magnetically induced current-density pathway in  $(C_5H_5)_2FeP$  splitting at the thiophene unit into an inner and an outer pathway.

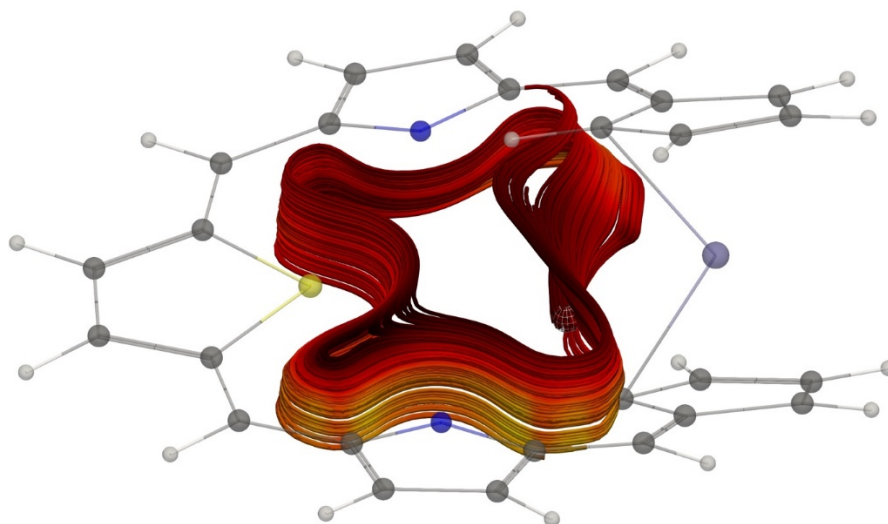

**Figure S12.** A streamline representation of the global paratropic magnetically induced current-density pathway in  $(C_5H_5)_2FeP$  on the inner perimeter of the molecule.
